# Supplementary material for: Unravelling the effects of tropical land use conversion on the soil microbiome
Source: Environ Microbiome. 2020 Feb 3;15:5. doi: 10.1186/s40793-020-0353-3 (PMC8067294; doi:10.1186/s40793-020-0353-3)
Supplement: Supplementary file 15 — Additional file 15: Table S3. Used abiotic measurements for all samples. [file 40793_2020_353_MOESM15_ESM.xlsx]

## Sheet: Additional_file_11_Table_3
Additional file 11: Table S3
SampleID	P (mg/kg soil)a	N (mg/kg soil)a	C (g/kg soil)a	C:N ratioa	pHa	Al (g/m²)a	Ca (g/m²)a	Fe (g/m²)a	K (g/m²)a	Mg (g/m²)a	Mn (g/m²)a	Na (g/m²)a	ECEC (effective cation exchange capacity, mmolc/kg)a	Base saturationa	basal respiration (Âµg O2*h-1*g soil dw-1)b	microbial biomass (Âµg Cmic*g soil dw-1)b	H2O (% of dry weight)b	Land Use Indexc
BF1	12.5712	2662	31274	11.6776	4.34	37.1597	26.5724	2.88618	9.97672	7.44071	4.45479	5.89231	74.2365	32.7684	4.88706	402.106	74.4472	0
BF2	18.8668	4690	51.14	10.812	4.15	117.734	93.9255	1.05429	20.3614	18.3282	13.2324	2.32468	214.108	32.3658	9.07844	714.625	191.073	0
BF3	14.8444	1928	29588	15.1441	4.2	32.8574	4.96099	5.68885	4.226	2.05795	0.206579	3.1862	55.5688	12.2742	6.45999	355.757	137.688	0
BF4	10614	1376	20.31	14.7547	4.09	15.9263	3.87272	5.29493	3.23181	1.21085	0.139025	2.80909	33.3135	14.2253	7.98963	608.704	40.6381	1.29324
BJ1	8104	3400.67	43.4647	12.816	4.49	56.9352	3.98359	3.26706	4.78769	2.55836	0.307346	4.23034	75.9696	7.21209	7.77708	693.913	162.727	1.29324
BJ2	8.0604	4070	51546	12.6496	4.41	115.105	40.0613	3.76811	11.4884	17.3811	3.30945	4.67321	178.218	22.1398	8.87321	900.169	96.9972	1.31727
BJ3	6.4412	2308	31902	13.5252	4.56	46.5243	33.3706	2.82774	5.92829	7.98928	3.31818	4.16216	86.3462	31.6824	6.54816	530.439	165.015	1.26876
BJ4	9.8104	3824	46946	12.273	4.49	88.019	55.9151	2.02423	16.0255	19.922	3.08533	3.85564	157.469	31.9084	7.90986	651.132	110.92	4.21501
BO1	24.7016	2856	37258	13.1187	4.46	32.0063	61.8206	1.28703	3.9694	2.69502	0.452928	0.116646	73.9224	35.2403	5.80002	503.381	118.175	1.66748
BO2	18005	2300	30.33	13.3214	4.52	35.2572	40.1387	1.05515	2.948	2.39648	2.03882	0.436306	67.067	30.0321	5.5463	390.863	123.519	4.37676
BO3	50.02	2866	37554	13.1659	4.41	30.6402	112.265	0.159011	4.91378	5.92734	4.87427	1.44727	102.999	58.113	3.70542	340.286	84.6871	3.87652
BO4	6.0798	3402	43.89	12.8687	4.45	39.6225	22.1372	0.317168	7.2033	3.03336	6.33304	5.61682	68.2858	26.5667	8.14833	778.993	51.7173	4.14466
BR1	2.8942	1746	23106	13.2612	4.7	30.9234	13.0153	1.0728	3.27879	3.46714	1.41683	1.48508	49.0169	21.8052	5.52055	482.773	91.8492	4.38211
BR2	3.8528	1754	26.11	14.7827	4.52	28.5239	19.7168	2.45144	2.87699	3.57101	1.80291	1.05078	50.9144	26.0427	4.47593	510.529	98.4419	4.95299
BR3	4.8544	1548	24554	15.8165	4.46	29.3618	7.3975	3.78526	3.19489	2.23875	0.476015	4.97521	47.0472	18.7202	5.38588	574.361	105.204	2.79279
BR4	5.7066	2920	38602	13.195	4.27	99.9628	18.6908	2.04262	7.42894	6.60422	2.17633	5.05362	138.182	13.8638	4.04746	438.436	119.658	0
HF1	5.6474	1448	21056	14.5209	4.3	26.6606	3.24538	1.11341	2.63987	2.02866	0.365457	0.244013	36.6138	10.7782	5.6391	436.749	33.1813	0
HF2	3935	1877362	26.9083	14.2522	4.21	32.4313	3.35509	0.658988	3.03029	1.42789	0.403198	0.575861	41.9847	9.10753	6.01815	381.496	41.1374	0
HF3	2.4606	1941908	26.2222	13.5888	4.22	30.4136	3.95976	0.588038	3.27399	1.7999	0.20576	0.682811	41.1274	10.8461	5.05725	482.347	46.9577	1.39979
HF4	5.4398	2106834	32.0129	15.1554	4.21	43.0769	11.4417	0.935537	4.17626	1.79526	0.176795	0.690466	59.326	11.6411	5.10308	428.647	38.5076	1.11511
HJ1	4454	2103824	25.5872	12.1977	4.39	49.0945	8.12203	0.389979	3.10319	1.88842	0.924066	0.974319	62.9586	9.83202	4.49134	667.279	38.5911	1.09809
HJ2	13578	2300964	48.7939	17.1265	4.4	25.5009	8.10792	0.291506	2.55747	1.19506	0.067488	1.80421	36.1163	15.8005	4.19366	403.724	34.9692	0.950972
HJ3	4967	1564702	21.3203	13.6393	4.32	23.7567	6.89596	0.330783	2.30539	2.47376	0.297071	1.70751	34.2811	19.5055	3.89413	408.24	49.5663	3.00059
HJ4	3782	1504.29	21.2566	14.1386	4.39	19.8632	4.56713	0.327093	2.35988	2.44404	0.203763	1.5009	28.8585	18.8259	5.22109	325.615	36.8213	1.64713
HO1	13535	1726816	21.3269	12.3784	4.64	30.6927	39.737	0.512968	4.3547	4.36646	1.09114	6.16606	61.8578	42.447	4.49642	507.688	36.8057	5.12384
HO2	3.7838	1027.73	12.659	12.1235	4.39	22.5353	16.4007	0.495786	1.39103	0.975619	0.367805	5.47787	37.2204	28.9754	2.83583	350.779	31.5431	2.50854
HO3	9.7544	1376238	17.215	12.4891	4.39	17.59	5.44718	0.596732	1.1186	0.680789	0.146018	1.53167	24.5967	16.9551	3.73006	315.311	23.4893	4.23498
HO4	7.5404	1644998	22.5614	13.6967	4.35	23.26	12.3517	0.565902	1.41216	0.90354	0.217641	2.36634	34.3389	23.1437	1.81451	346.46	29.3576	3.39394
HR1	3.5898	1631266	16.083	9.82082	4.67	25.6538	35.2919	0.0813744	5.39341	7.41114	1.55713	1.51251	54.0437	42.5896	2.89957	331.798	38.3697	7.86846
HR2	4.7634	1639.5	18.5864	11.4127	4.54	33.883	10.7798	0.412599	3.76505	3.43267	0.882371	1.43314	47.5621	19.1561	3.21082	292.131	42.8129	6.04135
HR3	8.5958	1030048	13.1885	12.7675	4.28	22.0381	7.5818	0.360149	1.6933	0.938638	0.219727	1.43314	30.3737	13.7368	3.09308	263.107	30.805	0
HR4	1.5902	2265556	30.8327	13.6888	4.19	41.3412	4.14813	0.462948	2.55184	1.67569	0.544024	1.35376	51.901	8.7262	4.2789	582.566	44.5363	0
aAllen K, Corre MD, Tjoa A, Veldkamp E (2015). Soil Nitrogen-Cycling Responses to Conversion of Lowland Forests to Oil Palm and Rubber Plantations in Sumatra, Indonesia. PLoS One 10, e0133325. doi: 10.1371/journal.pone.0133325.
bKrashevska V, Klarner B, Widyastuti R, Maraun M, Scheu S (2015). Impact of tropical lowland rainforest conversion into rubber and oil palm plantations on soil microbial communities. Biology and Fertility of Soils 1-9. doi: 10.1007/s00374-015-1021-4.
cBrinkmann N, Schneider D, Sahner J, Ballauff J, Edy N, Barus H, Irawan B, Budi S W, Qaim M, Daniel R, Polle A (2019). Intensive tropical land use massively shifts soil fungal communities. Scientific Reports 9-1. doi: 10.1038/s41598-019-39829-4.
